# Supplementary material for: Machine learning approach to predicting persistent opioid use following lower extremity joint arthroplasty
Source: PubMed Central journal article supplement — Reg Anesth Pain Med. 2022 Feb 3;47(5):313–9. doi: 10.1136/rapm-2021-103299 (PMC8961772; doi:10.1136/rapm-2021-103299), 2022-02-03
Supplement: rapm-2021-103299supp001.pdf [file rapm-2021-103299supp001.pdf]

| <b>Variables</b>                       | <b>Definition</b>                                                                                                                                                                                     |
|----------------------------------------|-------------------------------------------------------------------------------------------------------------------------------------------------------------------------------------------------------|
| Persistent Opioid Use                  | Documented continued use of opioids 3-6 months after surgery                                                                                                                                          |
| Surgical Procedure                     | Whether patient received either a hip arthroplasty (posterolateral approach), hip arthroplasty (anterior approach), revision hip arthroplasty, total knee arthroplasty, or revision knee arthroplasty |
| Age                                    | years                                                                                                                                                                                                 |
| Sex                                    | male or female                                                                                                                                                                                        |
| Body Mass Index                        | body mass index at time of surgery                                                                                                                                                                    |
| English-speaking                       | if it is noted that patient can speak English and does not require interpreter                                                                                                                        |
| Preoperative opioid use                | active use of more than 20mg equivalent daily oxycodone use for at least two weeks prior to surgery                                                                                                   |
| Previous joint replacement surgery     | whether patient had a joint replacement surgery in either extremity/side prior to current surgery                                                                                                     |
| Hypertension                           | diagnosis of hypertension in chart                                                                                                                                                                    |
| Coronary Artery Disease                | diagnosis of coronary artery disease in chart                                                                                                                                                         |
| Congestive Heart Failure               | diagnosis of congestive heart failure in chart                                                                                                                                                        |
| Chronic Obstructive Pulmonary Disease  | diagnosis of chronic obstructive pulmonary disease in chart                                                                                                                                           |
| Asthma                                 | diagnosis of asthma in chart                                                                                                                                                                          |
| Obstructive Sleep Apnea                | diagnosis of obstructive sleep apnea in chart                                                                                                                                                         |
| Diabetes Mellitus                      | diagnosis of diabetes mellitus in chart                                                                                                                                                               |
| Insulin-dependent Diabetes Mellitus    | use of insulin as part of diabetic regimen                                                                                                                                                            |
| Anxiety/Depression                     | history of anxiety and/or depression in chart                                                                                                                                                         |
| Dementia                               | history of dementia                                                                                                                                                                                   |
| Renal Insufficiency                    | diagnosis of renal insufficiency in chart                                                                                                                                                             |
| Frequent Alcohol Use                   | patient drinks more than 1 drink per day                                                                                                                                                              |
| Active Smoker                          | patient currently smokes cigarettes daily                                                                                                                                                             |
| Frequent Marijuana Use                 | patient currently uses marijuana at least once a week                                                                                                                                                 |
| Active Illicit Drug Use                | patient currently uses illicit drugs at least once a week                                                                                                                                             |
| Severe Osteoarthritis of the Joint     | radiographic description of severe osteoarthritis on operative joint based on x-ray                                                                                                                   |
| Fracture                               | radiographic description of fracture on operative joint based on x-ray                                                                                                                                |
| Primary Anesthesia Type                | general versus neuraxial anesthesia (epidural, spinal, or combined spinal-epidural)                                                                                                                   |
| Peripheral Nerve Block                 | if patient received a peripheral nerve block for postoperative analgesia                                                                                                                              |
| Intraoperative Dexmedetomidine         | if patient received dexmedetomidine as part of their intraoperative anesthetic                                                                                                                        |
| Intraoperative Ketamine                | if patient received ketamine as part of their intraoperative anesthetic                                                                                                                               |
| Postoperative Day 1 Opioid Consumption | total opioid consumption measured in intravenous morphine equivalents on postoperative day 1                                                                                                          |
| Hospital Length of Stay                | duration of hospital stay since surgery measured in days                                                                                                                                              |
| Total Opioids Prescribed at Discharge  | total opioids prescribed at discharge measured in intravenous morphine equivalents                                                                                                                    |
| Oxycodone Prescribed at Discharge      | if patient was prescribed oral oxycodone on discharge                                                                                                                                                 |
| Morphine Prescribed at Discharge       | if patient was prescribed oral morphine on discharge                                                                                                                                                  |
| Hydromorphone Prescribed at Discharge  | if patient was prescribed oral hydromorphone on discharge                                                                                                                                             |
| Tramadol Prescribed at Discharge       | if patient was prescribed oral tramadol on discharge                                                                                                                                                  |

Hydrocodone Prescribed at Discharge      if patient was prescribed oral hydrocodone on discharge

---

**Supplementary Table 1.** Definitions of features included in the predictive models
