# Supplementary material for: Machine learning approach to predicting persistent opioid use following lower extremity joint arthroplasty
Source: PubMed Central journal article supplement — Reg Anesth Pain Med. 2022 Feb 3;47(5):313–9. doi: 10.1136/rapm-2021-103299 (PMC8961772; doi:10.1136/rapm-2021-103299), 2022-02-03
Supplement: rapm-2021-103299supp002.pdf [file rapm-2021-103299supp002.pdf]

| Machine Learning Approach         | F1       |           |           | accuracy |           |           | precision |           |           | recall   |           |           | AUC      |           |           |
|-----------------------------------|----------|-----------|-----------|----------|-----------|-----------|-----------|-----------|-----------|----------|-----------|-----------|----------|-----------|-----------|
|                                   | no SMOTE | SMOTE 1:2 | SMOTE 1:1 | no SMOTE | SMOTE 1:2 | SMOTE 1:1 | no SMOTE  | SMOTE 1:2 | SMOTE 1:1 | no SMOTE | SMOTE 1:2 | SMOTE 1:1 | no SMOTE | SMOTE 1:2 | SMOTE 1:1 |
| Logistic Regression               | 0.473    | 0.531     | 0.542     | 0.806    | 0.802     | 0.749     | 0.643     | 0.591     | 0.473     | 0.379    | 0.489     | 0.644     | 0.794    | 0.785     | 0.766     |
| Balanced Random Forest Classifier | 0.747    | 0.833     | 0.847     | 0.863    | 0.921     | 0.933     | 0.656     | 0.817     | 0.891     | 0.874    | 0.854     | 0.813     | 0.936    | 0.945     | 0.959     |
| Balanced Bagging Classifier       | 0.803    | 0.848     | 0.841     | 0.901    | 0.929     | 0.931     | 0.752     | 0.844     | 0.887     | 0.869    | 0.857     | 0.806     | 0.942    | 0.950     | 0.959     |
| Random Forest Classifier          | 0.797    | 0.820     | 0.847     | 0.919    | 0.924     | 0.932     | 0.934     | 0.895     | 0.884     | 0.701    | 0.763     | 0.818     | 0.957    | 0.959     | 0.959     |
| Multilayer Perceptron Classifier  | 0.399    | 0.473     | 0.505     | 0.802    | 0.801     | 0.712     | 0.690     | 0.649     | 0.440     | 0.301    | 0.401     | 0.638     | 0.777    | 0.772     | 0.759     |

**Supplementary Table 2.** Performance metrics on each machine learning approach with versus without using Synthetic Minority Oversampling Technique. We compare two different ratios for SMOTE: 1) 1:2 = one positive case to every 2 negative class; and 2) 1:1 = one positive case to every 1 negative class

AUC, area under the receiver operating characteristics curve

SMOTE, Synthetic Minority Oversampling Technique
